# Supplementary material
Source: PubMed Central journal article supplement (PMC2770085)

## Supplementary figure

### Supplementary A

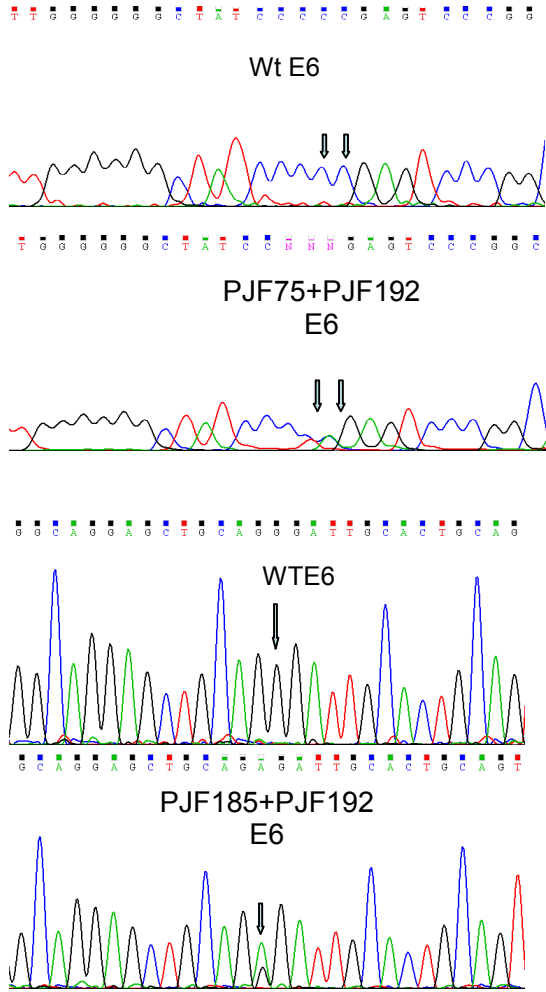

### Supplementary B

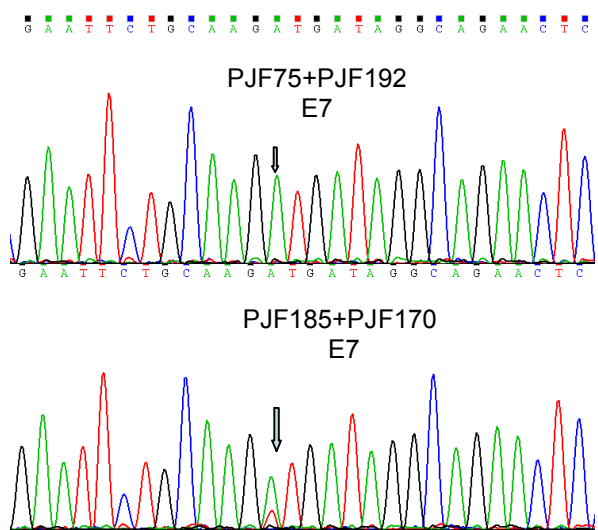

### Supplementary C

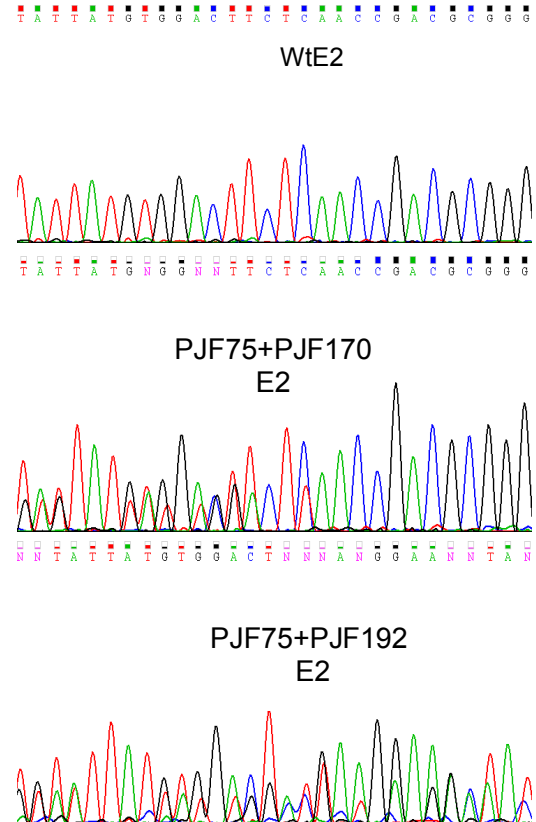

Supplement: NIHMS147682-supplement-01.pdf [file NIHMS147682-supplement-01.pdf]
